# Supplementary material for: Gravity driven separation of emulsified oil–water mixtures utilizing in situ polymerized superhydrophobic and superoleophilic nanofibrous membranes
Source: Royal Society of Chemistry journal article supplement (doi:10.1039/c3ta13385k), 2013-01-01
Supplement: c3ta13385k.pdf [file c3ta13385k.pdf]

## Gravity driven separation of emulsified oil/water mixtures utilizing in-situ polymerized superhydrophobic and superoleophilic nanofibrous membranes

Meiling Huang,<sup>‡ab</sup> Yang Si,<sup>‡bc</sup> Xiaomin Tang,<sup>ab</sup> Zhigao Zhu,<sup>bc</sup> Bin Ding,<sup>\*abc</sup> Lifang Liu,<sup>ab</sup> Gang Zheng,<sup>d</sup> Wenjing Luo<sup>\*d</sup> and Jianyong Yu<sup>b</sup>

<sup>a</sup> College of Textiles, Donghua University, Shanghai 201620, China. E-mail: binding@dhu.edu.cn

<sup>b</sup> Nanomaterials Research Center, Modern Textile Institute, Donghua University, Shanghai 200051, China.

<sup>c</sup> State Key Laboratory for Modification of Chemical Fibers and Polymer Materials, College of Materials Science and Engineering, Donghua University, Shanghai 201620, China.

<sup>d</sup> Department of Occupational & Environmental Health, School of Public Health, Fourth Military Medical University, 17 Changlexi Road, Xian 710032, China. E-mail: luowenj@fmmu.edu.cn

‡ These authors have contributed equally to this work.

## Support information

### Materials

Poly(vinyl alcohol) (PVA,  $M_w=88000$ ), *m*-(trifluoromethyl)aniline (tfa), paraformaldehyde, *p*-hydroxybenzaldehyde, phosphoric acid ( $H_3PO_4$ , 85%), trichloromethane, acetone, sodium hydroxide, anhydrous magnesium sulfate and hydrophobic  $Al_2O_3$  NPs (6-30nm) were purchased from Shanghai Chemical Reagents Co., Ltd., China. Tetraethyl orthosilicate (TEOS) was purchased from Lingfeng Chemical Co., Ltd., China. Pure water was obtained from a Millipore system. All chemicals were of analytical grade and were used as received without further purification.

### Synthesis of BAF-CHO monomer

The BAF-CHO was synthesized using *m*-(trifluoromethyl)aniline (tfa), paraformaldehyde, and *p*-hydroxybenzaldehyde through Mannich reaction, as shown in Fig. S1. Briefly, 24.4 g of tfa, 32.2 g of *p*-hydroxybenzaldehyde and 6 g of paraformaldehyde were added into a three necked round bottom flask. Then the temperature was gradually increased to 105°C with continued stirring for 4 h in an inert atmosphere. After cooling to room temperature, the obtained product was dissolved in 250 mL of trichloromethane. The solution was purified by washing with 1 wt% sodium hydroxide and pure water, then treated with anhydrous magnesium sulfate and filtered, and dried at 60°C for 4 h to acquire BAF-CHO powder. The detail of structural confirmation by  $^1H$  NMR spectroscopy were presented in Fig. S2.

### Preparation of silica nanofibers (SNF)

The precursor solution was prepared by dissolving the PVA powder in pure water at 80°C with vigorous stirring for 12 h. A silica gel with the molar composition of  $TEOS:H_3PO_4:H_2O=1:0.01:11$  was prepared by hydrolysis and polycondensation, by drop wise addition of  $H_3PO_4$  to TEOS with stirring at room temperature for another 12 h. The 10 g resultant silica gel was added into the PVA (10 g) solution and stirred

for another 4 h. Following the electrospinning process was performed by using a DXES-1 spinning equipment (Shanghai Oriental Flying Nanotechnology Co., Ltd., China) with an applied high voltage of 20 kV and a controllable feed rate of 1 mL/h. To obtain the pure SNF, the composite membranes were calcined to 800°C by gradually increasing the temperature at the heating rate of 5 °C/min in air to remove the PVA.

### **Fabrication of F-PBZ/Al<sub>2</sub>O<sub>3</sub> NPs modified SiO<sub>2</sub> nanofibrous membranes**

The F-PBZ/Al<sub>2</sub>O<sub>3</sub> NPs modified membranes were obtained by first dipping the SNF membranes in acetone solutions with 1 wt% of BAF-CHO and 1 wt% of Al<sub>2</sub>O<sub>3</sub> NPs. Following the membranes were dried in the oven for 20 min at 60°C, and then in situ polymerization of BAF-CHO was carried out at 200°C in vacuum for 1 h, leading to the formation of the Mannich bridge cross-linked structure, and finally generating functional membranes (F-SNF/Al<sub>2</sub>O<sub>3</sub>) with cured thermosetting F-PBZ layer on the fiber surface. In addition, the membranes without Al<sub>2</sub>O<sub>3</sub> NPs (F-SNF) were also prepared for comparison.

### **Emulsion separation experiment**

Typically, the as-prepared F-SNF/Al<sub>2</sub>O<sub>3</sub> membranes was sealed between one vertical glass tube with a diameter of 38 mm and one conical flask. The 100 mL freshly prepared emulsion was poured onto the F-SNF/Al<sub>2</sub>O<sub>3</sub> membrane and spontaneously permeated quickly. The flux was determined by calculating the permeated volume of an emulsion within 1 min. To test the cycle performance, the membrane was washed with ethanol and dried in 50 °C for 30 min after each separation cycle.

### **Characterization**

The <sup>1</sup>H NMR spectrum was recorded using the Bruker Avance 400, d<sub>6</sub>-DMSO was used as the solvent. FT-IR spectra were measured with a Nicolet 8700 FT-IR spectrometer in the range 4000-400 cm<sup>-1</sup>. The morphology of membranes was imaged by field emission scanning electron microscopy using S-4800, Hitachi Ltd., Japan, all

samples were coated with carbon for 5 min before analysis. N<sub>2</sub> adsorption-desorption isotherms were examined at 77 K by an ASAP 2020 physisorption analyzer (Micromeritics Co., USA). Water contact angle (WCA) (3 μL), oil contact angle (OCA) (3 μL) and sliding angle (10 μL) measurements were performed by a contact angle goniometer Kino SL200B equipped with tilting base. The water contact angle hysteresis was measured using increment decrement method.

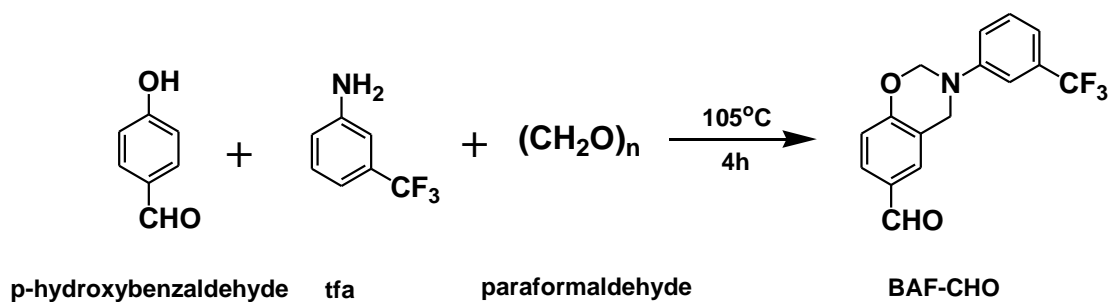

Fig. S1 Chemical synthetic route of BAF-CHO.

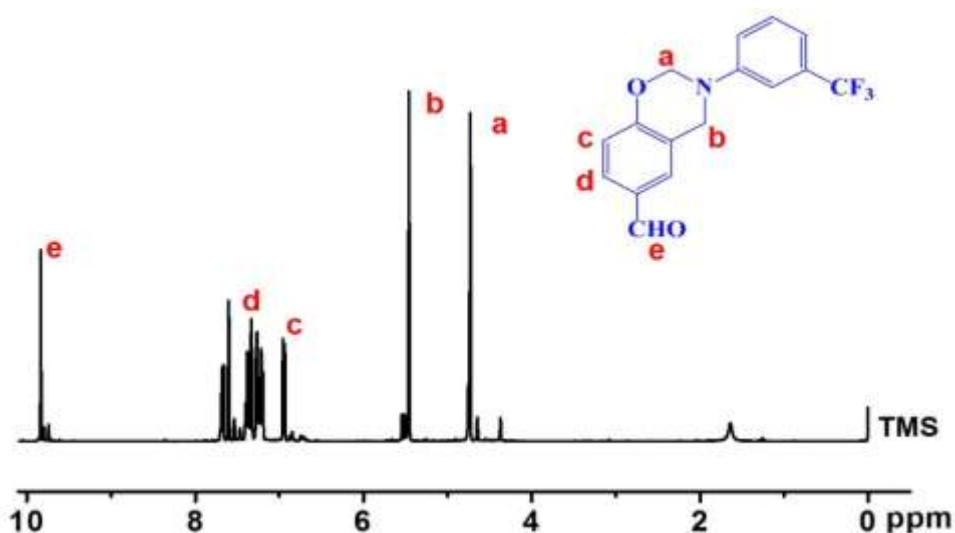

Fig. S2 <sup>1</sup>H NMR spectrograph of BAF-CHO

The as-synthesized BAF-CHO monomer after purification was subjected to <sup>1</sup>H NMR spectroscopic analysis, as shown in Fig. S2. Specific for oxazine ring, the peaks for Ar-CH<sub>2</sub>-N and N-CH<sub>2</sub>-O are observed in <sup>1</sup>H NMR, which are distinctive of benzoxazine monomers. For BAF-CHO monomer, the characteristic protons of Ar-CH<sub>2</sub>-N and N-CH<sub>2</sub>-O appeared at 4.71 and 5.45 ppm. Moreover, aromatic protons have given their chemical shift in the range of 6.92-7.67 ppm. The proton for aldehyde group has been appeared at 9.83 ppm. Acquisition of quantitative resulting from <sup>1</sup>H NMR analysis has confirmed the chemical structure of BAF-CHO.

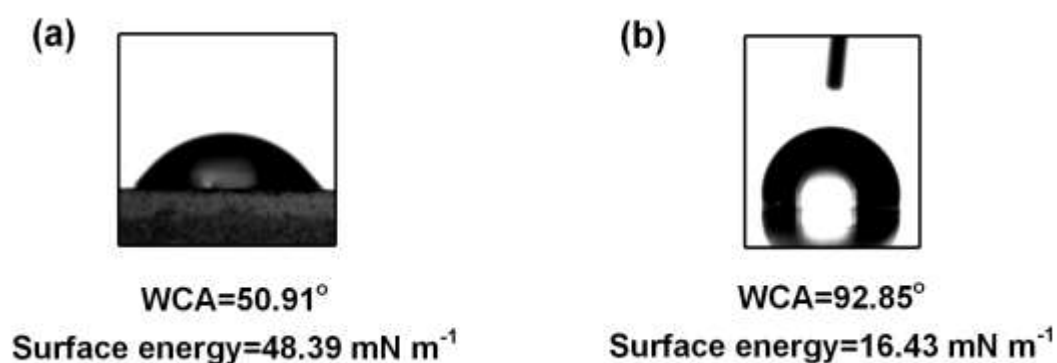

**Fig. S3** Optical profiles of water droplets on the (a) flat silica casting films and (b) flat F-PBZ casting films. The relevant surface energies were determined based on the relevant WCA values.

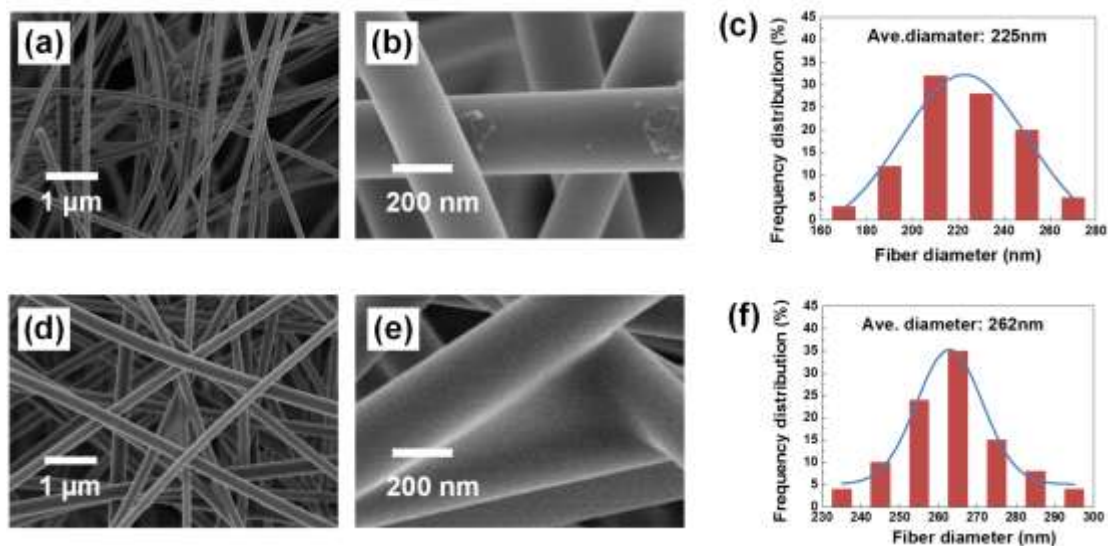

**Fig. S4** (a) Low and (b) high magnification FE-SEM images of SNF membranes. (c) Histogram showing the fiber diameter distribution of SNF membranes. (d) Low and (e) high magnification FE-SEM images of F-SNF membranes. (f) Histogram showing the fiber diameter distribution of F-SNF membranes.

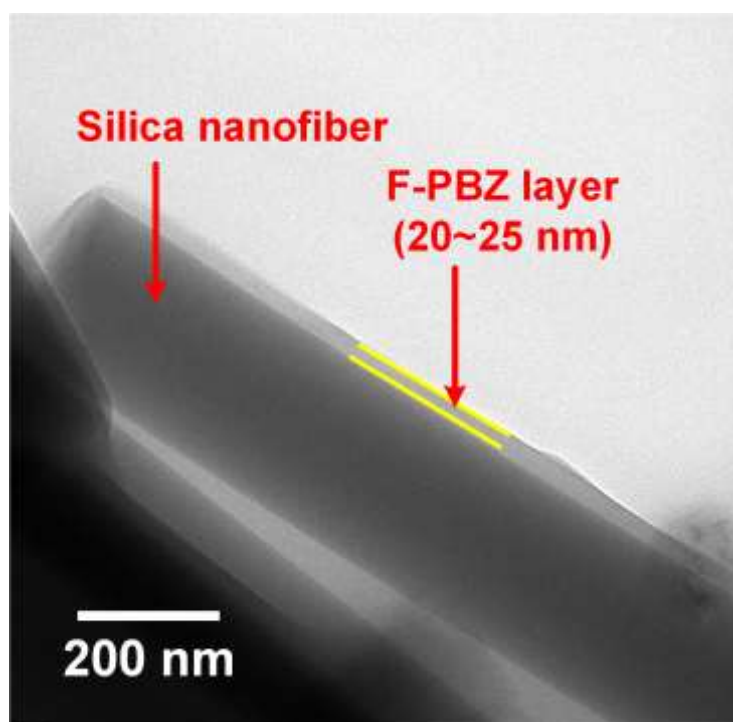

**Fig. S5** TEM image of the F-SNF membranes shows the well coated F-PBZ layer with the uniform thickness of 20~25 nm.

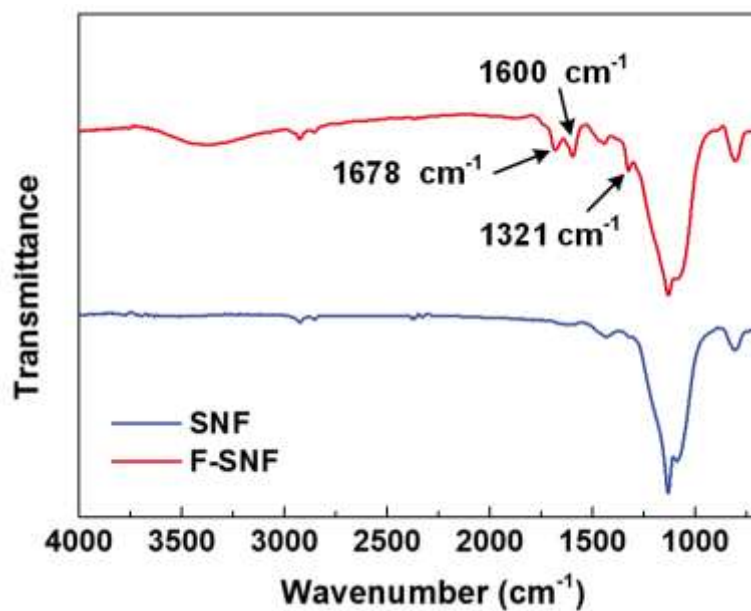

**Fig. S6** FT-IR spectra of SNF and F-SNF membranes shows the polymerization of BAF-CHO monomers on fibers surface.

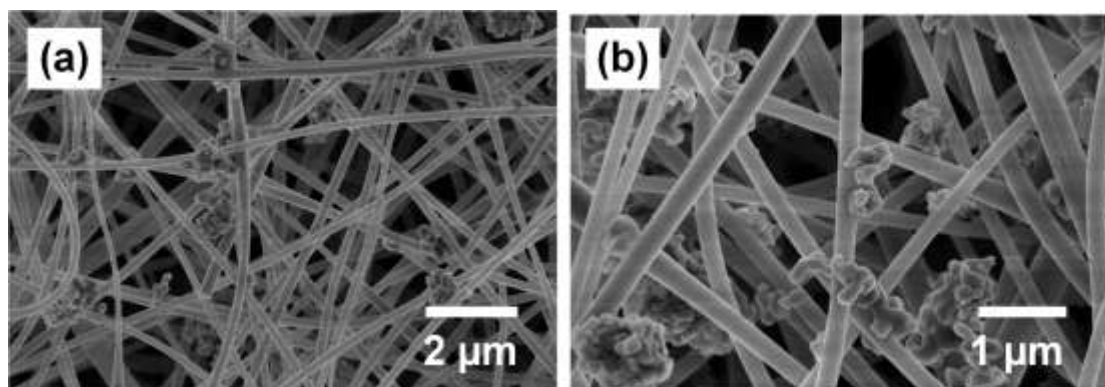

**Fig. S7** (a) Low and (b) high magnification FE-SEM images of F-SNF/Al<sub>2</sub>O<sub>3</sub> membranes after 10 separation cycles.



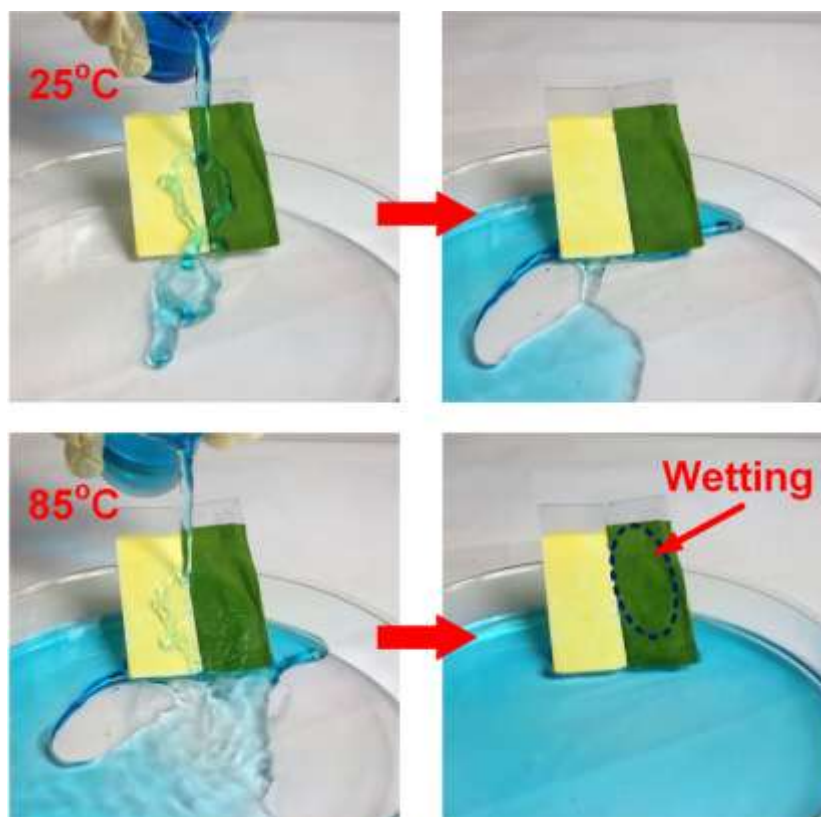

**Fig. S8** Optical photos of cool water (25°C) and hot water (85°C) dumped on the surface of lotus leaves (right green one) and F-SNF/Al<sub>2</sub>O<sub>3</sub> membrane (left yellow one), the water was dyed by methyl blue.

Generally, the separation membranes should enable to handle hot oil-water emulsified mixture in real industrial application. The repellent characteristics of F-SNF/Al<sub>2</sub>O<sub>3</sub> membrane and the classic superhydrophobic lotus leaves to hot water were presented in Fig. S4, and see also Movie S2. It can be seen that both the lotus leaves and F-SNF/Al<sub>2</sub>O<sub>3</sub> membrane exhibited good repellency towards water with 25°C. Meanwhile, the lotus leaves showed hydrophilic properties to hot water (85°C) with obvious wetting behavior (indicated by dotted circle). The F-SNF/Al<sub>2</sub>O<sub>3</sub> membrane, in contrast, still possessed robust hydrophobicity upon hot water without any wetting, thus implying good thermal stability towards real applications.

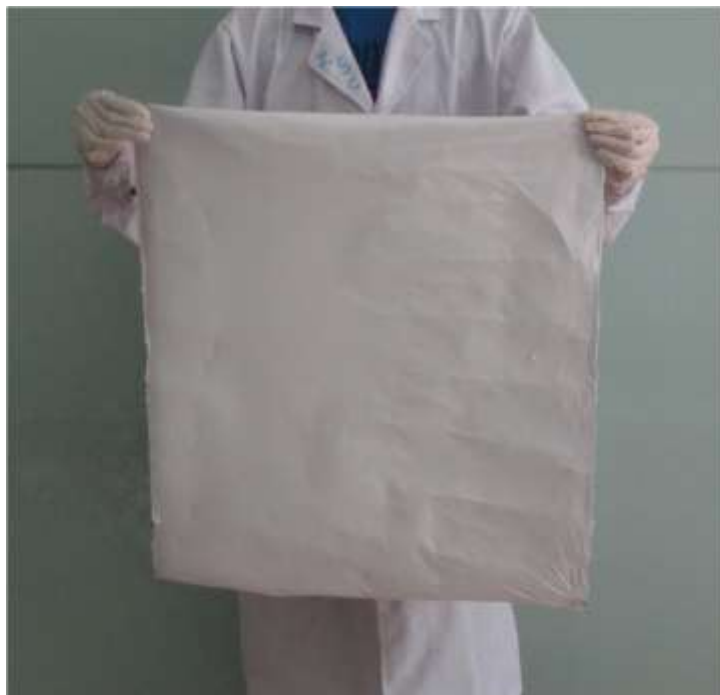

**Fig. S9** Photograph shows the large-scale (60×60 cm) of SNF nanofibrous membranes.
